# Supplementary material
Source: publisher site journal article supplement (http://www.kjim.org/upload/media/kjim-2016-343-suppl3.pdf)
Supplement: Supplementary file 1 [file kjim-2016-343-suppl3.pdf]

**Supplementary Table 3. Predictive costs of metabolic syndrome and its components over 5 years in males**

| Variable             | Simple regression model   |         | Multiple regression models I through VI |         | Multiple regression model VII |         | Multiple regression model VIII |         |
|----------------------|---------------------------|---------|-----------------------------------------|---------|-------------------------------|---------|--------------------------------|---------|
|                      | Parameter estimation, USD | p value | Parameter estimation, USD               | p value | Parameter estimation, USD     | p value | Parameter estimation, USD      | p value |
| Metabolic syndrome   | 3,110                     | < 0.001 | 2,030                                   | < 0.001 | 897                           | < 0.001 | 606                            | < 0.001 |
| Abdominal obesity    | 1,500                     | < 0.001 | 1,030                                   | < 0.001 | 182                           | 0.010   | 254                            | 0.001   |
| Hypertriglyceridemia | 1,544                     | < 0.001 | 1,117                                   | < 0.001 | 393                           | < 0.001 | 277                            | < 0.001 |
| Low HDL-C level      | 1,094                     | < 0.001 | 694                                     | < 0.001 | 130                           | 0.075   | 227                            | 0.003   |
| High blood pressure  | 2,720                     | < 0.001 | 1,522                                   | < 0.001 | 1,006                         | < 0.001 | 885                            | < 0.001 |
| Hyperglycemia        | 2,379                     | < 0.001 | 1,269                                   | < 0.001 | 657                           | < 0.001 | 629                            | < 0.001 |
| Age                  | 3,947                     | < 0.001 | <sup>a</sup>                            | < 0.001 | 3,335                         | < 0.001 | 3,110                          | < 0.001 |
| Intercept            | -                         | -       | <sup>b</sup>                            | < 0.001 | -1,236                        | < 0.001 | -863                           | < 0.001 |
| Cardiac disorders    | -                         | -       | -                                       | -       | -                             | -       | 3,098                          | < 0.001 |
| Stroke               | -                         | -       | -                                       | -       | -                             | -       | 3,549                          | < 0.001 |

Multiple regressions models I through VI include age, sex, household income level, smoking status, alcohol consumption, exercise status, and each individual component of metabolic syndrome. Multiple regression model VII includes all components of metabolic syndrome and controls for age, sex, household income level, smoking status, alcohol consumption, and exercise status. Multiple regression model VIII adds controls for cardiac disorders and stroke to model VII. Abdominal obesity, waist circumference  $\geq 90$  cm in men and  $\geq 85$  cm in women; hypertriglyceridemia, serum triglyceride  $\geq 150$  mg/dL; low HDL-C, HDL-C  $< 40$  mg/dL in men and  $< 50$  mg/dL in women; high blood pressure, blood pressure  $\geq 130/85$  mmHg or current use of antihypertensive medication; hyperglycemia, serum glucose  $\geq 100$  mg/dL or current use of medication for diabetes.

USD, US dollar; HDL-C, high density lipoprotein cholesterol.

<sup>a</sup>Individual parameter estimates for age were as follows: model I (MetS), 3,530 USD; model II (abdominal obesity), 3,773 USD; model III (hypertriglyceridemia), 3,723 USD; model IV (low HDL-C level), 3,804 USD; model V (high blood pressure), 3,514 USD; and model VI (hyperglycemia), 3,601 USD.

<sup>b</sup>Individual intercepts were as follows: model I (MetS), -911 USD; model II (abdominal obesity), -1,818 USD; model III (hypertriglyceridemia), -1,128 USD; model IV (low HDL-C level), -1,007 USD; model V (high blood pressure), -1,149 USD; and model VI (hyperglycemia), -986 USD.
